# Supplementary material for: The Mitotic Exit Network integrates temporal and spatial signals by distributing regulation across multiple components
Source: eLife journal article supplement (doi:10.7554/elife.41139), 2019-01-23
Supplement: supp [file elife-41139-supp-v1.zip]

Archive with 9 entries (9 files):
- elife_poa_e41139_Figure_5_figure_supplement_1.tif
- elife_poa_e41139_Supplementary_Figure_1.xlsx
- elife_poa_e41139_Figure_1_figure_supplement_1.tif
- elife_poa_e41139_Supplementary_Figure_2.xlsx
- elife_poa_e41139_Transparent_Reporting_File.pdf
- elife_poa_e41139_Figure_5_figure_supplement_2.tif
- elife_poa_e41139_Figure_1_figure_supplement_2.tif
- elife_poa_e41139_Figure_4_figure_supplement_1.tif
- elife_poa_e41139_Figure_3_figure_supplement_1.tif
