# Supplementary material for: The Mitotic Exit Network integrates temporal and spatial signals by distributing regulation across multiple components
Source: eLife journal article supplement (doi:10.7554/elife.41139), 2019-01-23
Supplement: supp [file elife-41139-supp-v1.zip › elife_poa_e41139_Supplementary_Figure_1.xlsx]

## Sheet: Sheet1
Supplement Table 1: Yeast Strains
Strain	Relevant Genotype
Ay2587	MATa, ade2-1, leu2-3, ura3, trp1-1, his3-11,15, can1-100, GAL, psi+ (wild-type W303)
Ay39323	SPC42-mCherry:KanMx6, MOB1-eGFP::KanMx6, cdc14::cdc14-tdTomato::HIS3
Ay39374	SPC42-mCherry:KanMx6, MOB1-eGFP::KanMx6, cdc14::cdc14-tdTomato::HIS3, cdc23-1
Ay40568	SPC42-mCherry:KanMx6, MOB1-eGFP::KanMx6, cdc14::cdc14-tdTomato::HIS3, cdc23-1, mcd1-1
Ay39461	SPC42-mCherry:KanMx6, MOB1-eGFP::KanMx6, cdc14::cdc14-tdTomato::HIS3, cdc23-1, mcd1-1, mad1::URA
Ay37828	NUD1-3V5::KanMX6, MET-CDC20::URA3, mad1::URA
Ay37907	NUD1-3V5::KanMX6, MET-CDC20::URA3, mad1::URA, mcd1-1
Ay37739	NUD1-3V5::KanMX6, mad1::URA, mcd1-1
Ay37904	NUD1-3V5::KanMX6, mad1::URA, mcd1-1, GAL-PDS1dBΔ::URA3
Ay37497	DBF2-3MYC, mad1::URA, mcd1-1, GAL-PDS1dBΔ::URA3
Ay37523	DBF2-3MYC, mad1::URA, mcd1-1
Ay38079	NUD1-3V5::KanMX6, mad1::URA, mcd1-1, esp1-1
Ay37500	DBF2-3MYC, mad1::URA, mcd1-1, esp1-1
Ay38127	NUD1-3V5::KanMX6, mad1::URA, mcd1-1, bns1::KanMX, spo12::HIS3
Ay38112	NUD1-3V5::KanMX6, mad1::URA, mcd1-1, cdc14-3
Ay37714	DBF2-3MYC, mad1::URA, mcd1-1, cdc14-3
Ay39378	SPC42-mCherry:KanMx6, MOB1-eGFP::KanMx6, cdc14::cdc14-tdTomato::HIS3, slk19::HIS3
Ay39353	SPC42-mCherry:KanMx6, MOB1-eGFP::KanMx6, cdc14::cdc14-tdTomato::HIS3, cdc15-2
Ay33715	SPC42-mCherry:KanMx6, MOB1-eGFP::KanMx6
Ay39542	SPC42-mCherry:KanMx6, MOB1-eGFP::KanMx6, GAL-PDS1dBΔ::URA3
Ay39541	SPC42-mCherry:KanMx6, MOB1-eGFP::KanMx6, cdc14-3
Ay39540	SPC42-mCherry:KanMx6, MOB1-eGFP::KanMx6, GAL-PDS1dBΔ::URA3, cdc14-3
Ay39477	cdc3::mCherry-CDC3::URA3, ura3::pAFS125-TUB1p-GFPTUB1::URA3
Ay40240	cdc3::mCherry-CDC3::URA3, ura3::pAFS125-TUB1p-GFPTUB1::URA3, slk19::HIS3
Ay39547	cdc3::mCherry-CDC3::URA3, ura3::pAFS125-TUB1p-GFPTUB1::URA3, cdc20-1
Ay40016	cdc3::mCherry-CDC3::URA3, ura3::pAFS125-TUB1p-GFPTUB1::URA3, cdc23-1
Ay40103	cdc3::mCherry-CDC3::URA3, ura3::pAFS125-TUB1p-GFPTUB1::URA3, cdc20-1, bub2::HIS3
Ay40076	cdc3::mCherry-CDC3::URA3, ura3::pAFS125-TUB1p-GFPTUB1::URA3, cdc23-1, bub2::HIS3
Ay39689	cdc3::mCherry-CDC3::URA3, ura3::pAFS125-TUB1p-GFPTUB1::URA3, cdc20-1, clb2-VI::HIS3
Ay40015	cdc3::mCherry-CDC3::URA3, ura3::pAFS125-TUB1p-GFPTUB1::URA3, cdc23-1, clb2-VI::HIS3
Ay39819	cdc3::mCherry-CDC3::URA3, ura3::pAFS125-TUB1p-GFPTUB1::URA3, cdc20-1, clb2-VI::HIS3, cdc15-2
Ay39846	cdc3::mCherry-CDC3::URA3, ura3::pAFS125-TUB1p-GFPTUB1::URA3, cdc13-1
Ay40074	cdc3::mCherry-CDC3::URA3, ura3::pAFS125-TUB1p-GFPTUB1::URA3, cdc13-1, bub2::HIS3
Ay39845	cdc3::mCherry-CDC3::URA3, ura3::pAFS125-TUB1p-GFPTUB1::URA3, cdc13-1, clb2-VI::HIS3
Ay40566	cdc3::mCherry-CDC3::URA3, ura3::pAFS125-TUB1p-GFPTUB1::URA3,cdc9-1
Ay40567	cdc3::mCherry-CDC3::URA3, ura3::pAFS125-TUB1p-GFPTUB1::URA3,cdc9-1, bub2::HIS3
Ay40565	cdc3::mCherry-CDC3::URA3, ura3::pAFS125-TUB1p-GFPTUB1::URA3,cdc9-1, clb2-VI::HIS3
Ay40293	cdc3::mCherry-CDC3::URA3, trp1::ADH1-NLSCdc14-GFP::TRP1, SPC42-mCherry:NatMx6
Ay40295	cdc3::mCherry-CDC3::URA3, trp1::ADH1-NLSCdc14-GFP::TRP1, SPC42-mCherry:NatMx6, cdc20-1
Ay40296	cdc3::mCherry-CDC3::URA3, trp1::ADH1-NLSCdc14-GFP::TRP1, SPC42-mCherry:NatMx6, cdc20-1, bub2::HIS3
Ay40292	cdc3::mCherry-CDC3::URA3, trp1::ADH1-NLSCdc14-GFP::TRP1, SPC42-mCherry:NatMx6, cdc20-1, clb2-VI::HIS3
Ay40294	cdc3::mCherry-CDC3::URA3, trp1::ADH1-NLSCdc14-GFP::TRP1, SPC42-mCherry:NatMx6, cdc20-1, MOB1-2A::hphNT1
Ay39848	cdc3::mCherry-CDC3::URA3, ura3::pAFS125-TUB1p-GFPTUB1::URA3, cdc20-1, cdc15::HIS3, leu2:: CDC15-HA3-LEU2
Ay39847	cdc3::mCherry-CDC3::URA3, ura3::pAFS125-TUB1p-GFPTUB1::URA3, cdc20-1, cdc15::HIS3, leu2:: CDC15-HA3-7A-LEU2
Ay40105	cdc3::mCherry-CDC3::URA3, ura3::pAFS125-TUB1p-GFPTUB1::URA3, cdc20-1, MOB1::hphNT1
Ay40106	cdc3::mCherry-CDC3::URA3, ura3::pAFS125-TUB1p-GFPTUB1::URA3, cdc20-1, MOB1-2A::hphNT1
Ay40143	cdc3::mCherry-CDC3::URA3, ura3::pAFS125-TUB1p-GFPTUB1::URA3, cdc20-1, cdc15::HIS3, leu2:: CDC15-HA3-LEU2, MOB1::hphNT1
Ay40187	cdc3::mCherry-CDC3::URA3, ura3::pAFS125-TUB1p-GFPTUB1::URA3, cdc20-1, cdc15::HIS3, leu2:: CDC15-HA3-7A-LEU2, MOB1-2A::hphNT1
Ay40512	Kar9-GFP:HisMx6, ura3:pRS306-mCherry-TUB1:URA3
Ay40524	Kar9-GFP:HisMx6, ura3:pRS306-mCherry-TUB1:URA3, cdc15::CDC15-as1(L99G)::URA3
Ay40530	Kar9-GFP:HisMx6, ura3:pRS306-mCherry-TUB1:URA3
Ay40529	Kar9-GFP:HisMx6, ura3:pRS306-mCherry-TUB1:URA3, cdc15-2
Ay40559	ura3::pAFS125-TUB1p-GFPTUB1::URA3, SPC42-mCherry:NatMx6
Ay40556	ura3::pAFS125-TUB1p-GFPTUB1::URA3, SPC42-mCherry:NatMx6, cdc15::CDC15-as1(L99G)::URA3
Ay40562	ura3::pAFS125-TUB1p-GFPTUB1::URA3, SPC42-mCherry:KanMx6, kar9::HIS5
Ay39895	ADE2, cdc14::CDC14-linker-yEGFP::KanMX, ura3::ADH1-NLSCdc14-TagRFP::URA3
Ay40177	ADE2, cdc14::CDC14-linker-yEGFP::KanMX, ura3::ADH1-NLSCdc14-TagRFP::URA3, slk19::HIS3
Ay40095	ADE2, cdc14::CDC14-linker-yEGFP::KanMX, ura3::ADH1-NLSCdc14-TagRFP::URA3, cdc15::CDC15-as1(L99G)::URA3
Ay40094	ADE2, cdc14::CDC14-linker-yEGFP::KanMX, ura3::ADH1-NLSCdc14-TagRFP::URA3, bns1::KanMX, spo12::HIS3
