# Supplementary material for: The Mitotic Exit Network integrates temporal and spatial signals by distributing regulation across multiple components
Source: eLife journal article supplement (doi:10.7554/elife.41139), 2019-01-23
Supplement: supp [file elife-41139-supp-v1.zip › elife_poa_e41139_Supplementary_Figure_2.xlsx]

## Sheet: Sheet1
Supplement Table 2: Plasmids used in this study
Plasmid	Relevant genotype
pA1358	pAFS125-TUB1p-GFPTUB1
pA2621	pCK074-2 pRS305H-MOB1
pA2622	pCK079-1 pRS305H-MOB1S36A,T85A
pA2733	p404-ADH1-NLS(Cdc14)-GFP
pA2736	p406-ADH1-NLS(Cdc14)-TagRFP
