# Supplementary figures and images for: The Mitotic Exit Network integrates temporal and spatial signals by distributing regulation across multiple components
Source: eLife journal article supplement (doi:10.7554/elife.41139), 2019-01-23

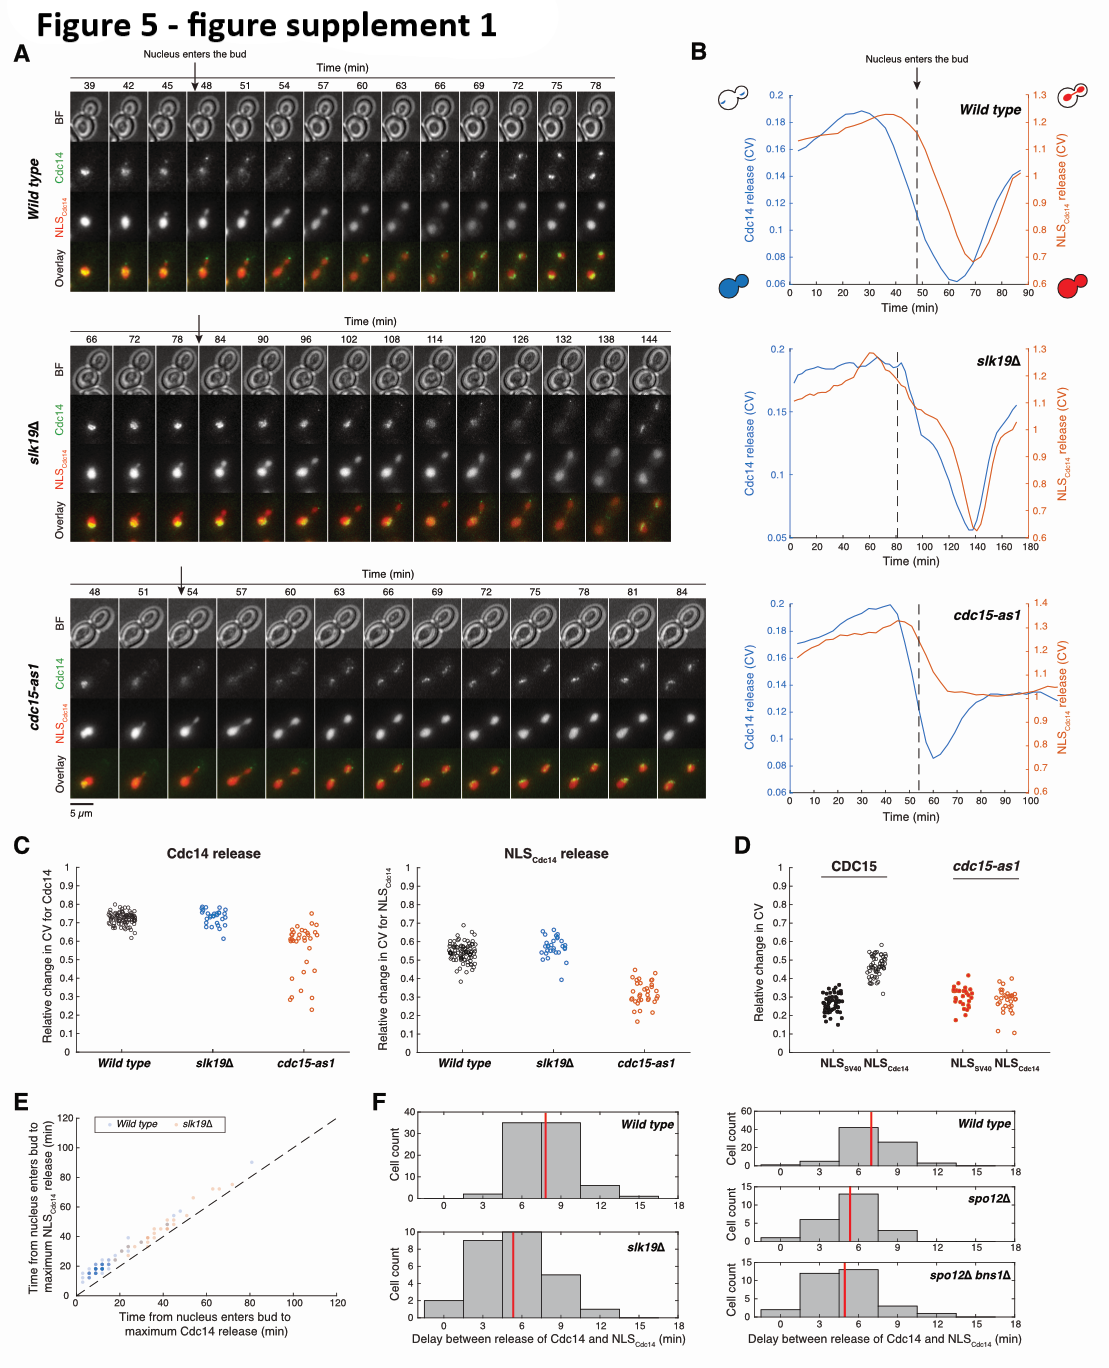

Supplement: supp [file elife-41139-supp-v1.zip › elife_poa_e41139_Figure_5_figure_supplement_1.tif]

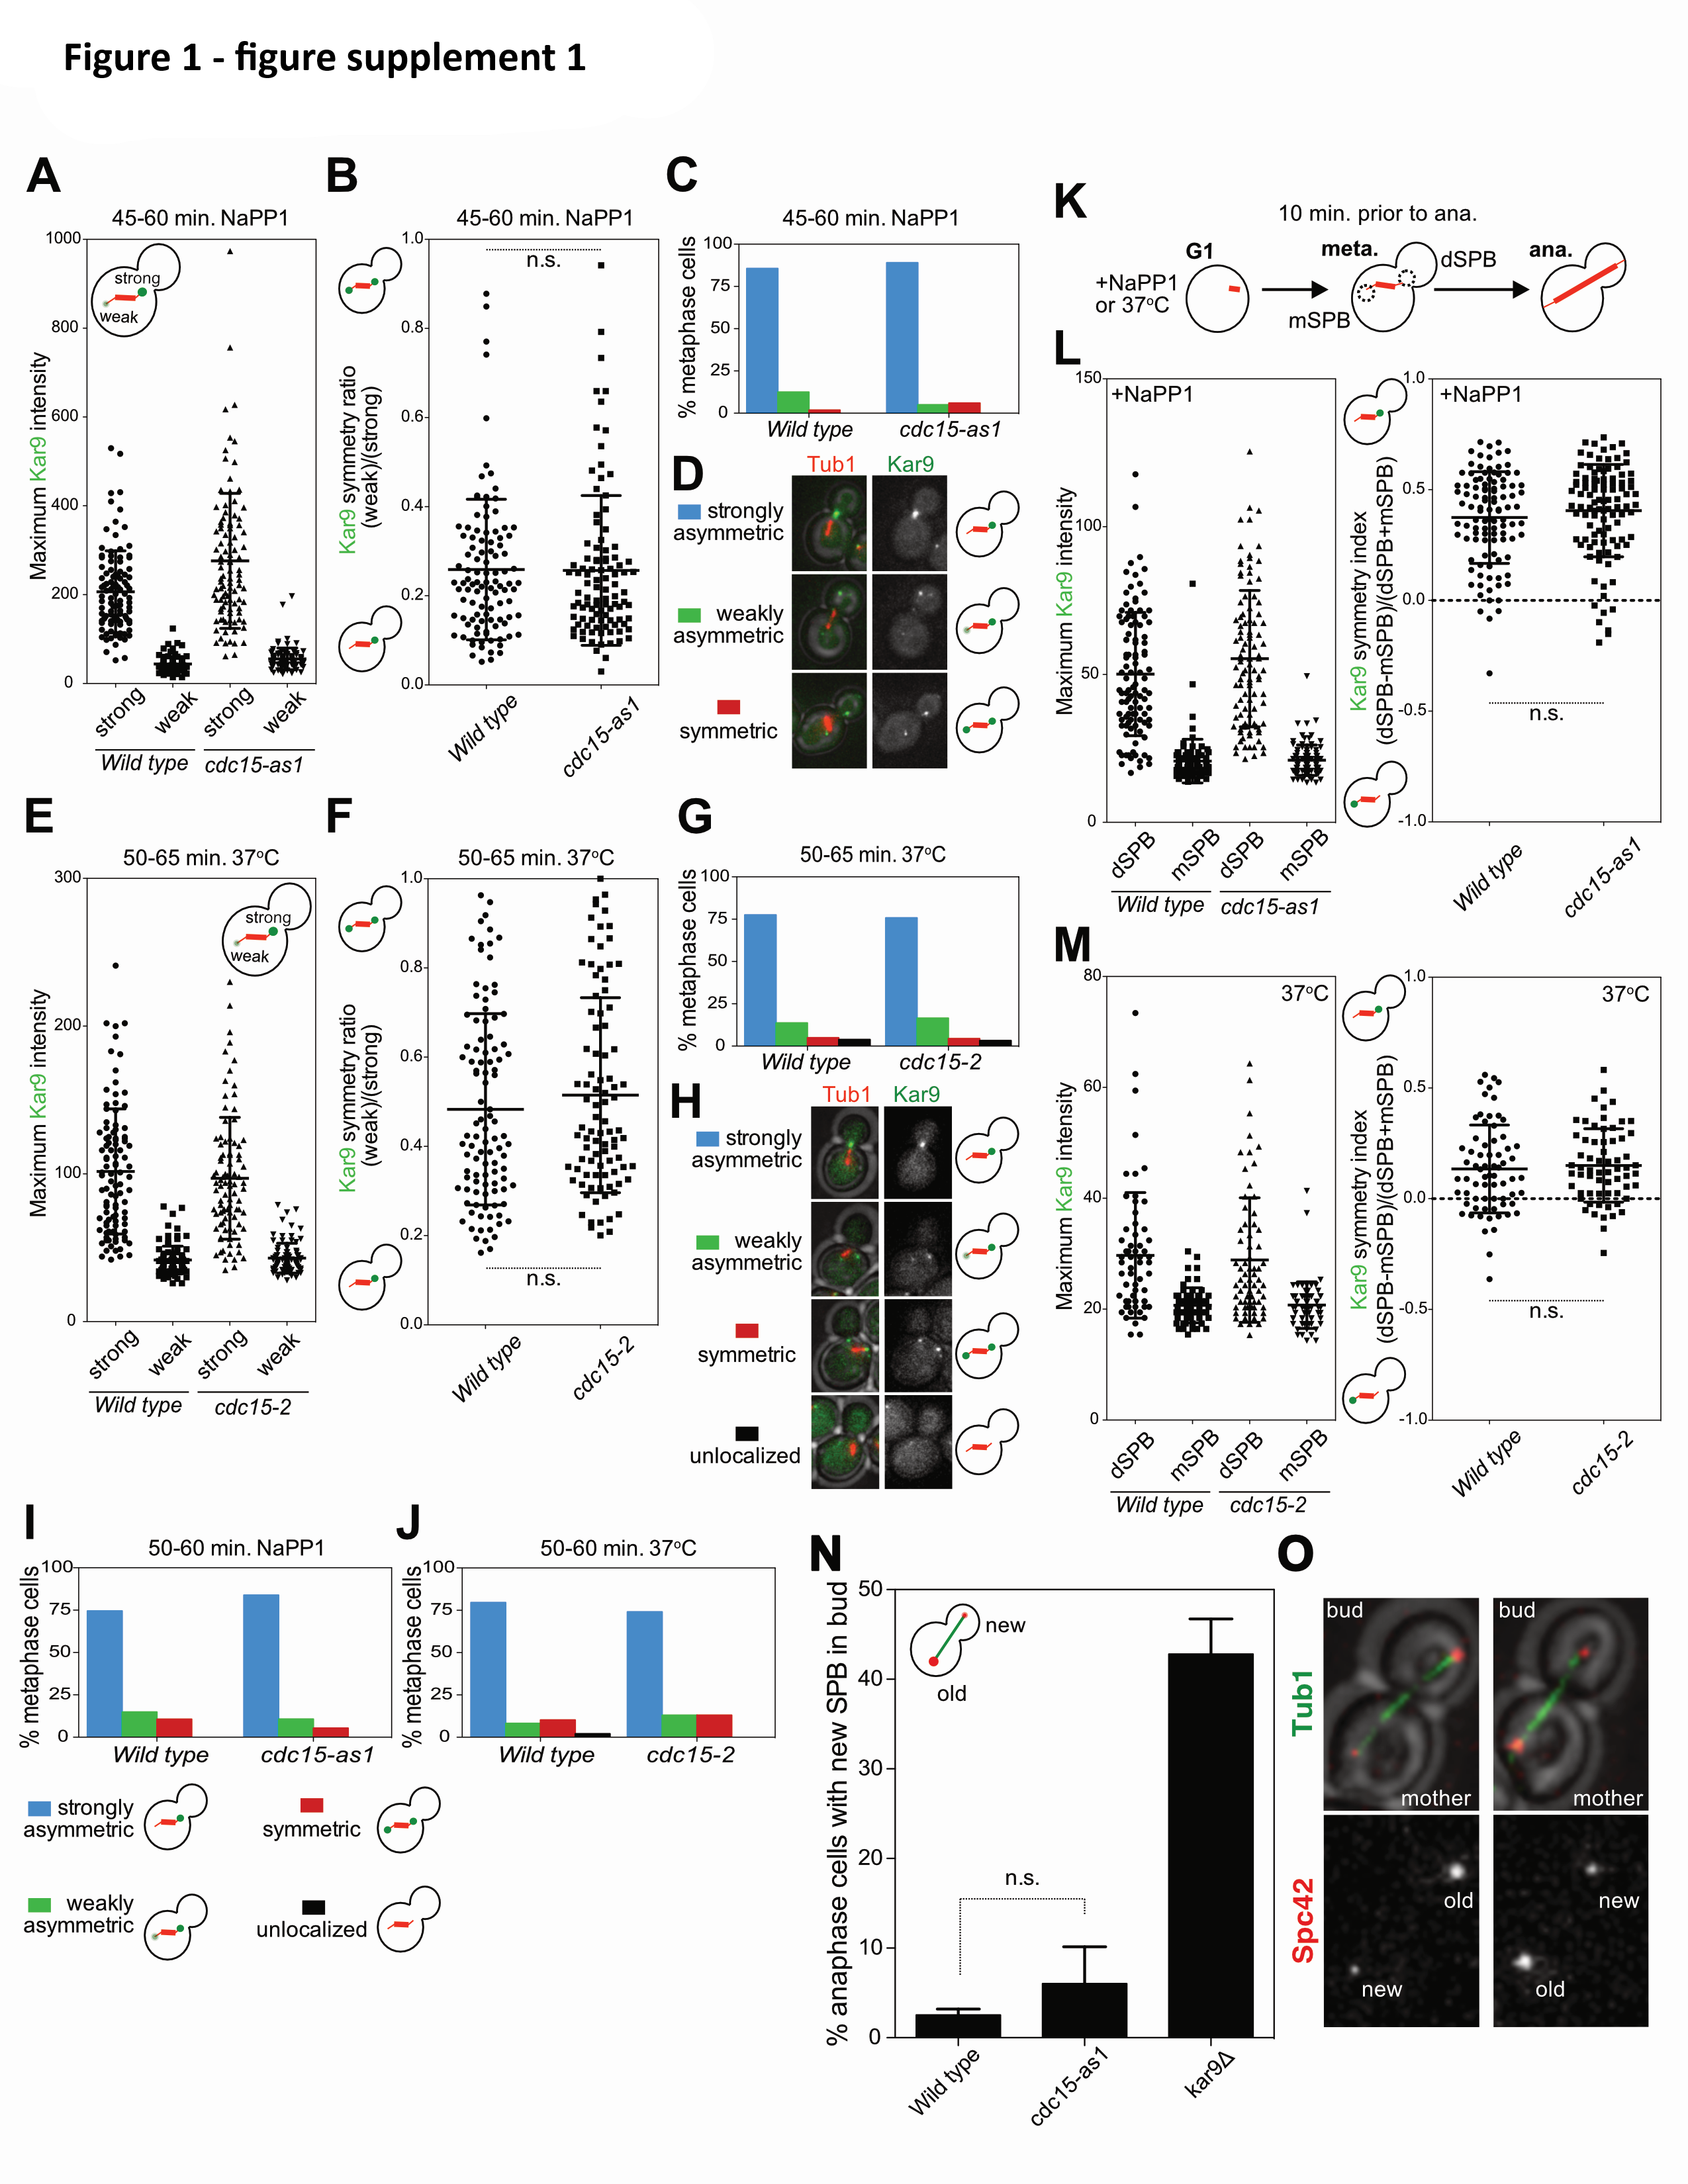

Supplement: supp [file elife-41139-supp-v1.zip › elife_poa_e41139_Figure_1_figure_supplement_1.tif]

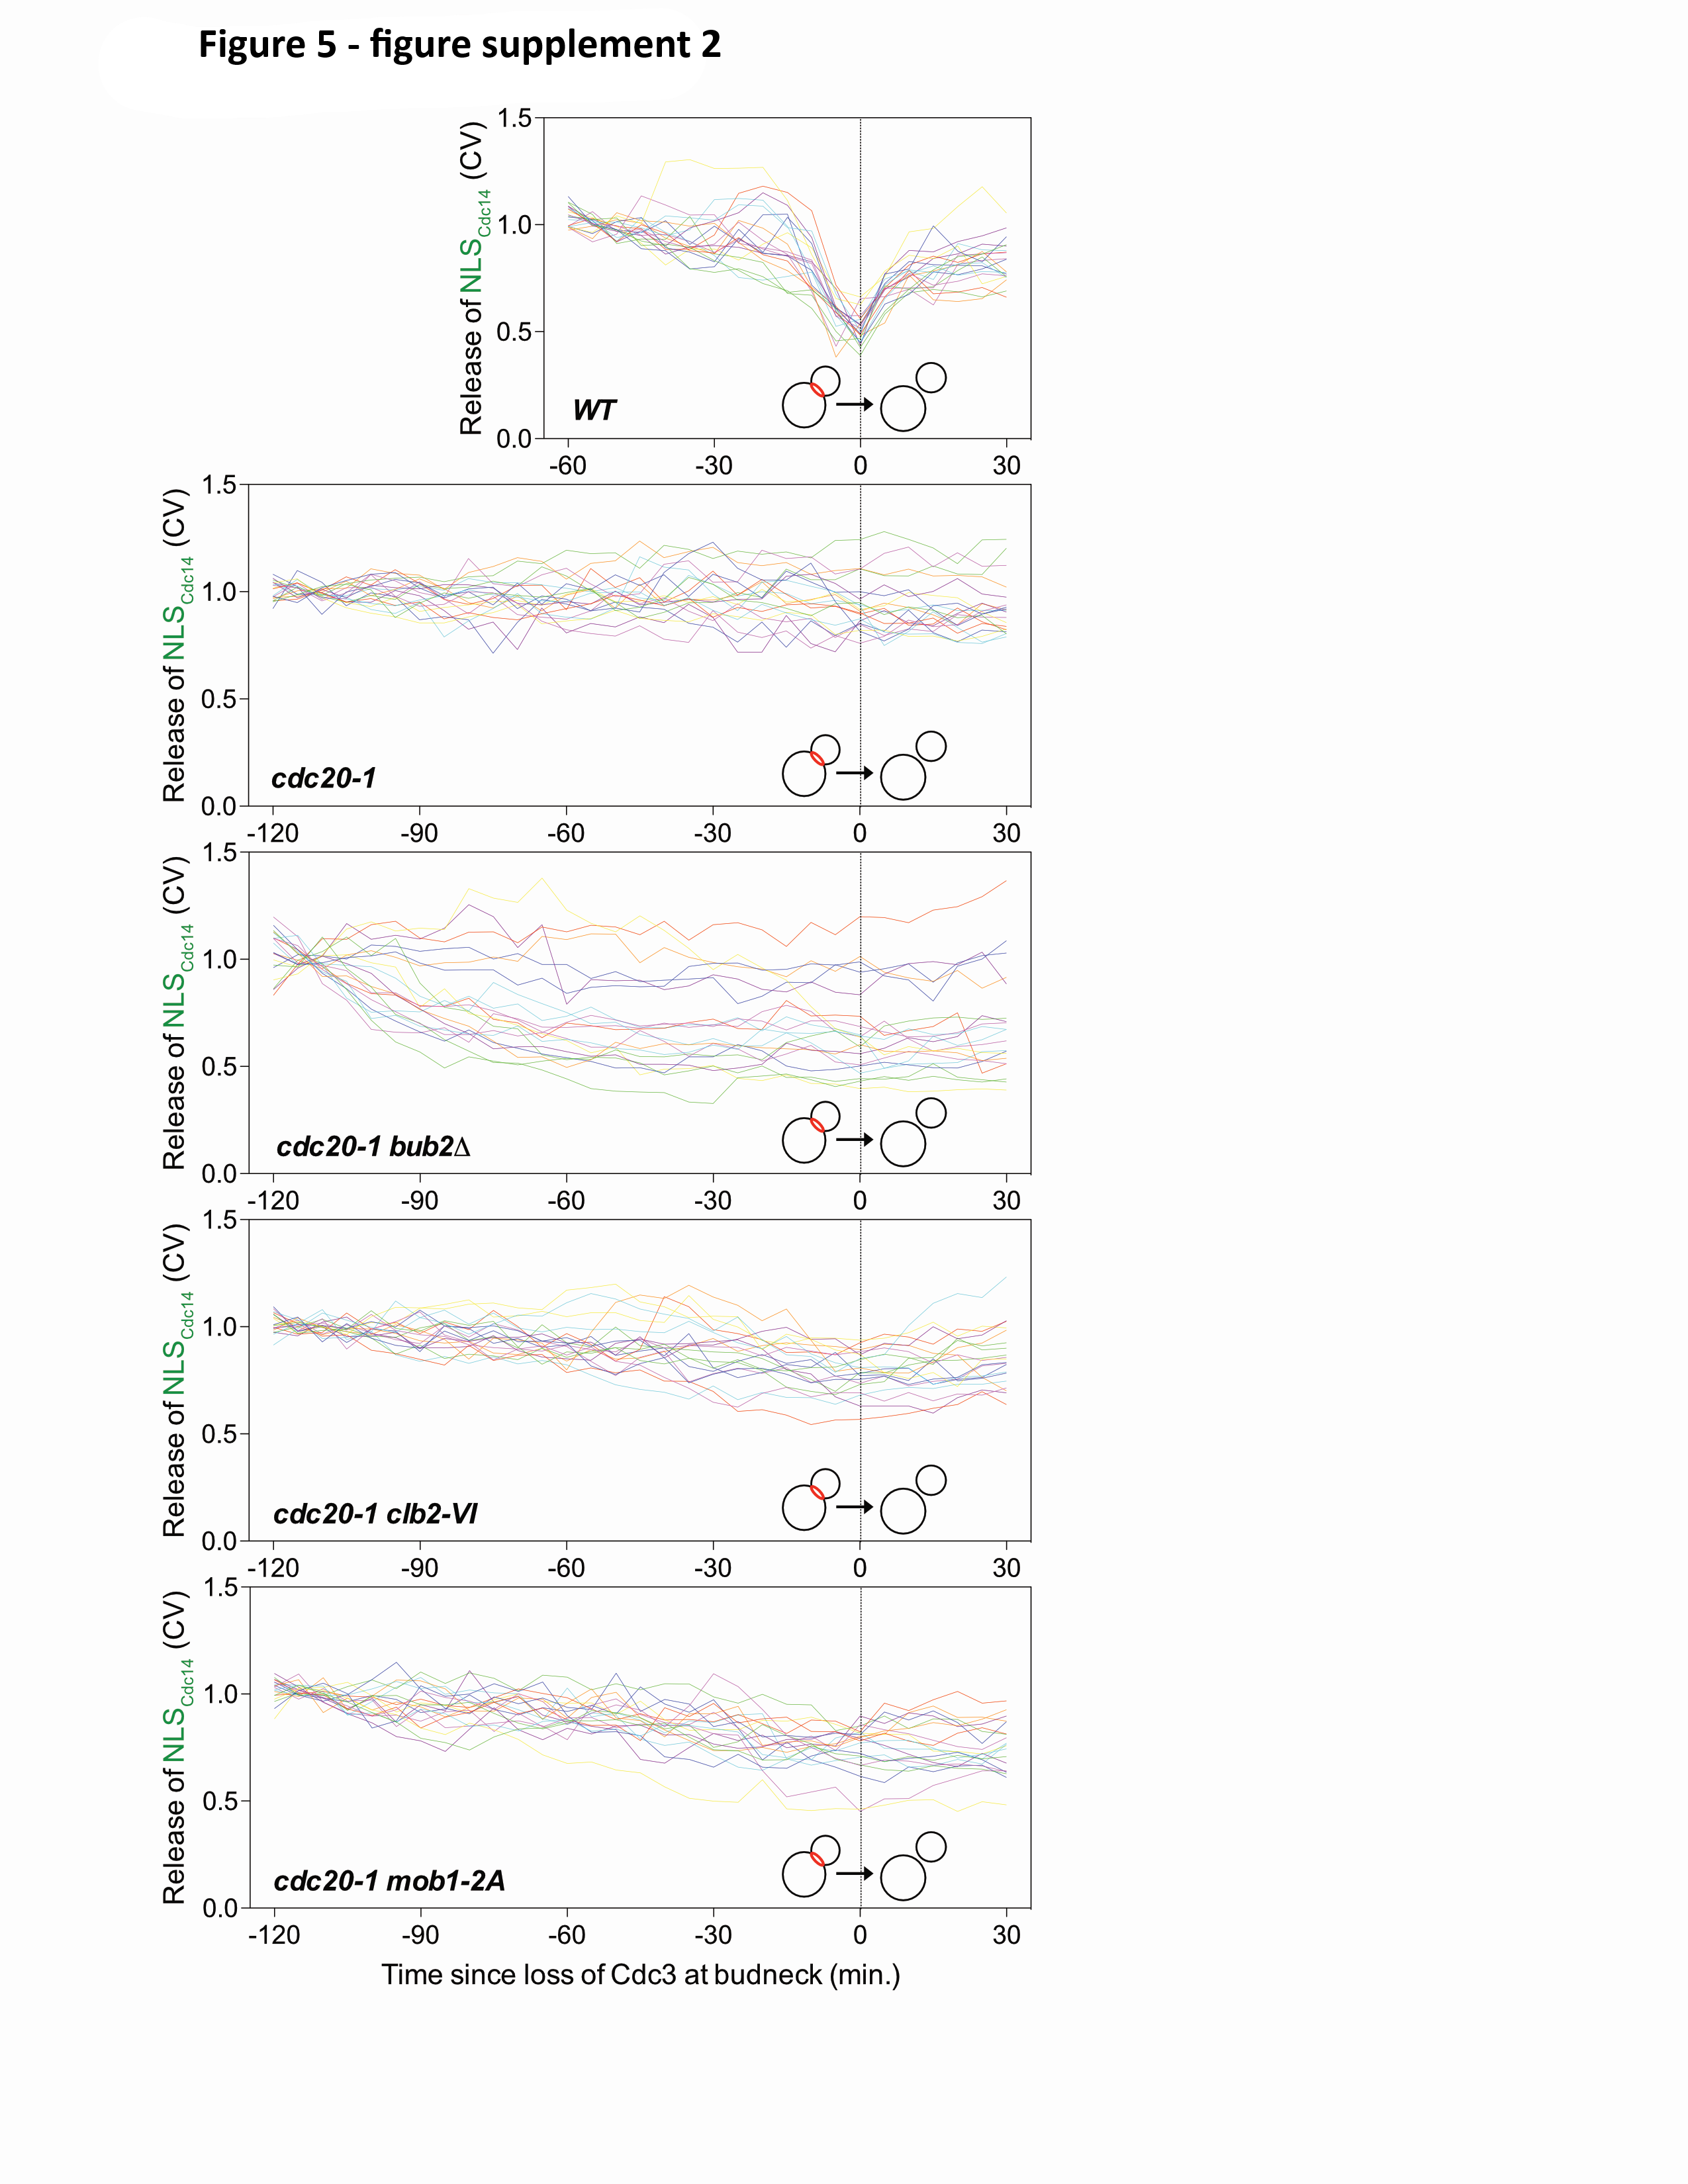

Supplement: supp [file elife-41139-supp-v1.zip › elife_poa_e41139_Figure_5_figure_supplement_2.tif]

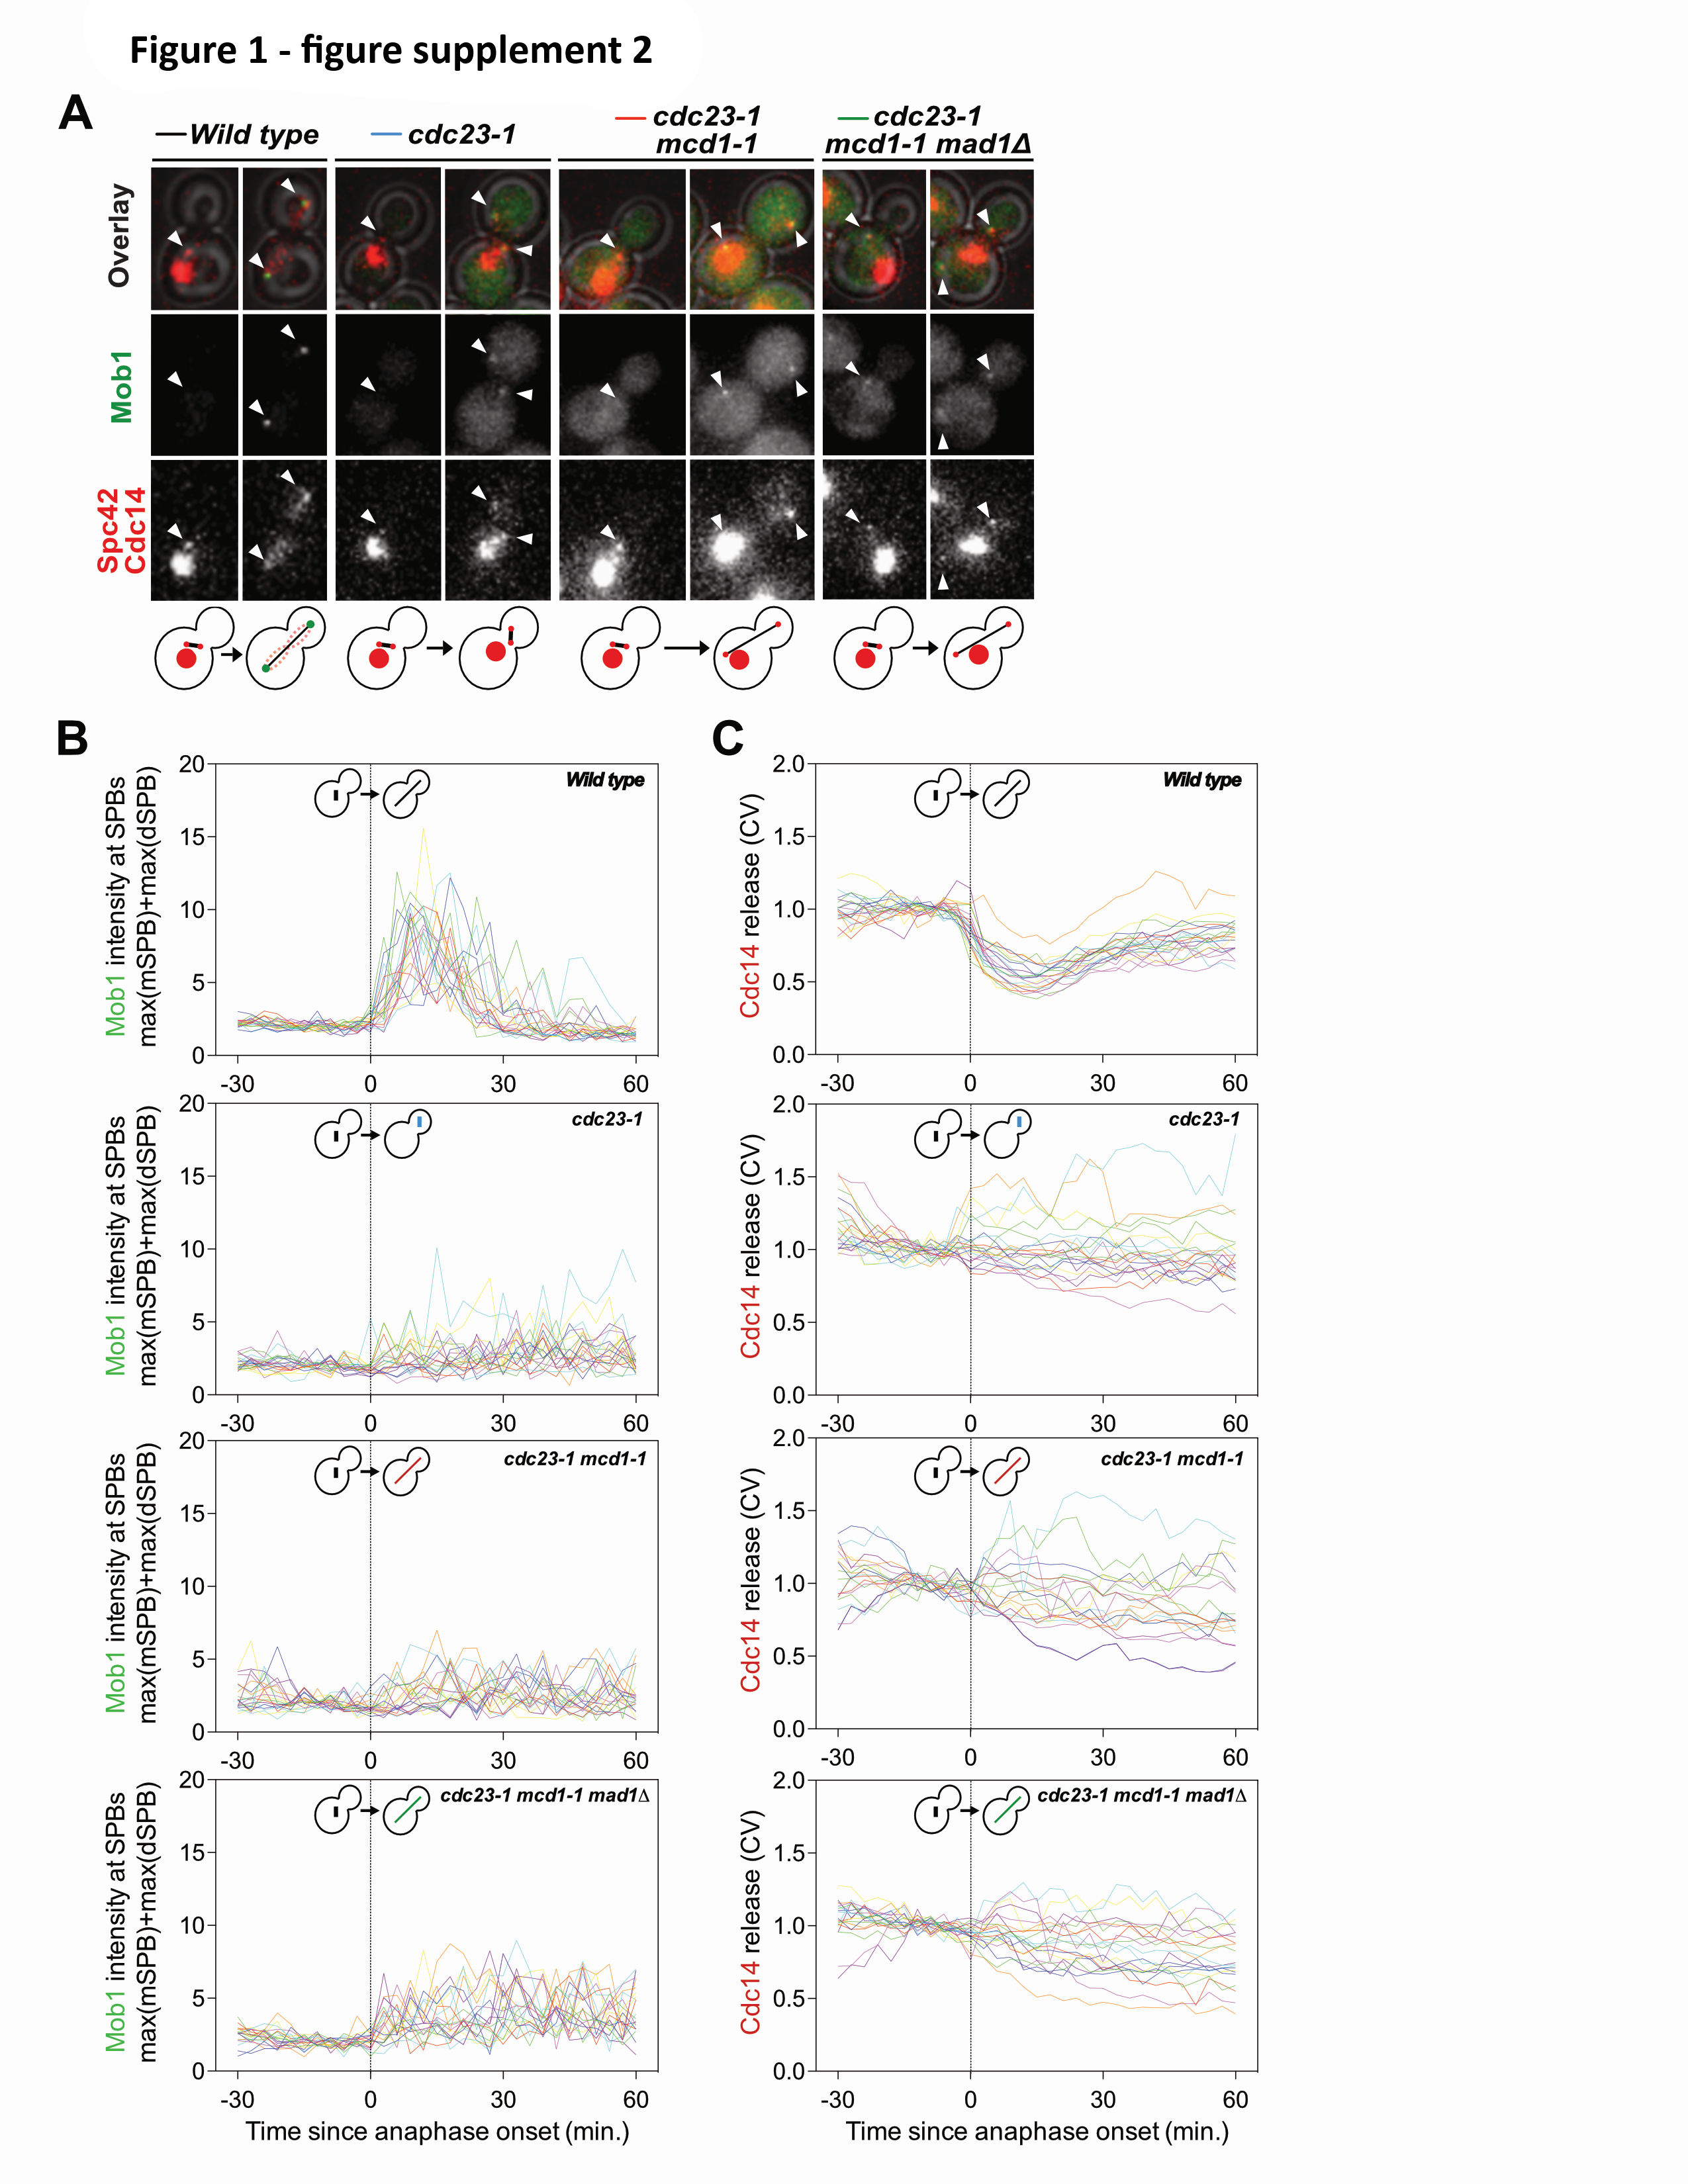

Supplement: supp [file elife-41139-supp-v1.zip › elife_poa_e41139_Figure_1_figure_supplement_2.tif]

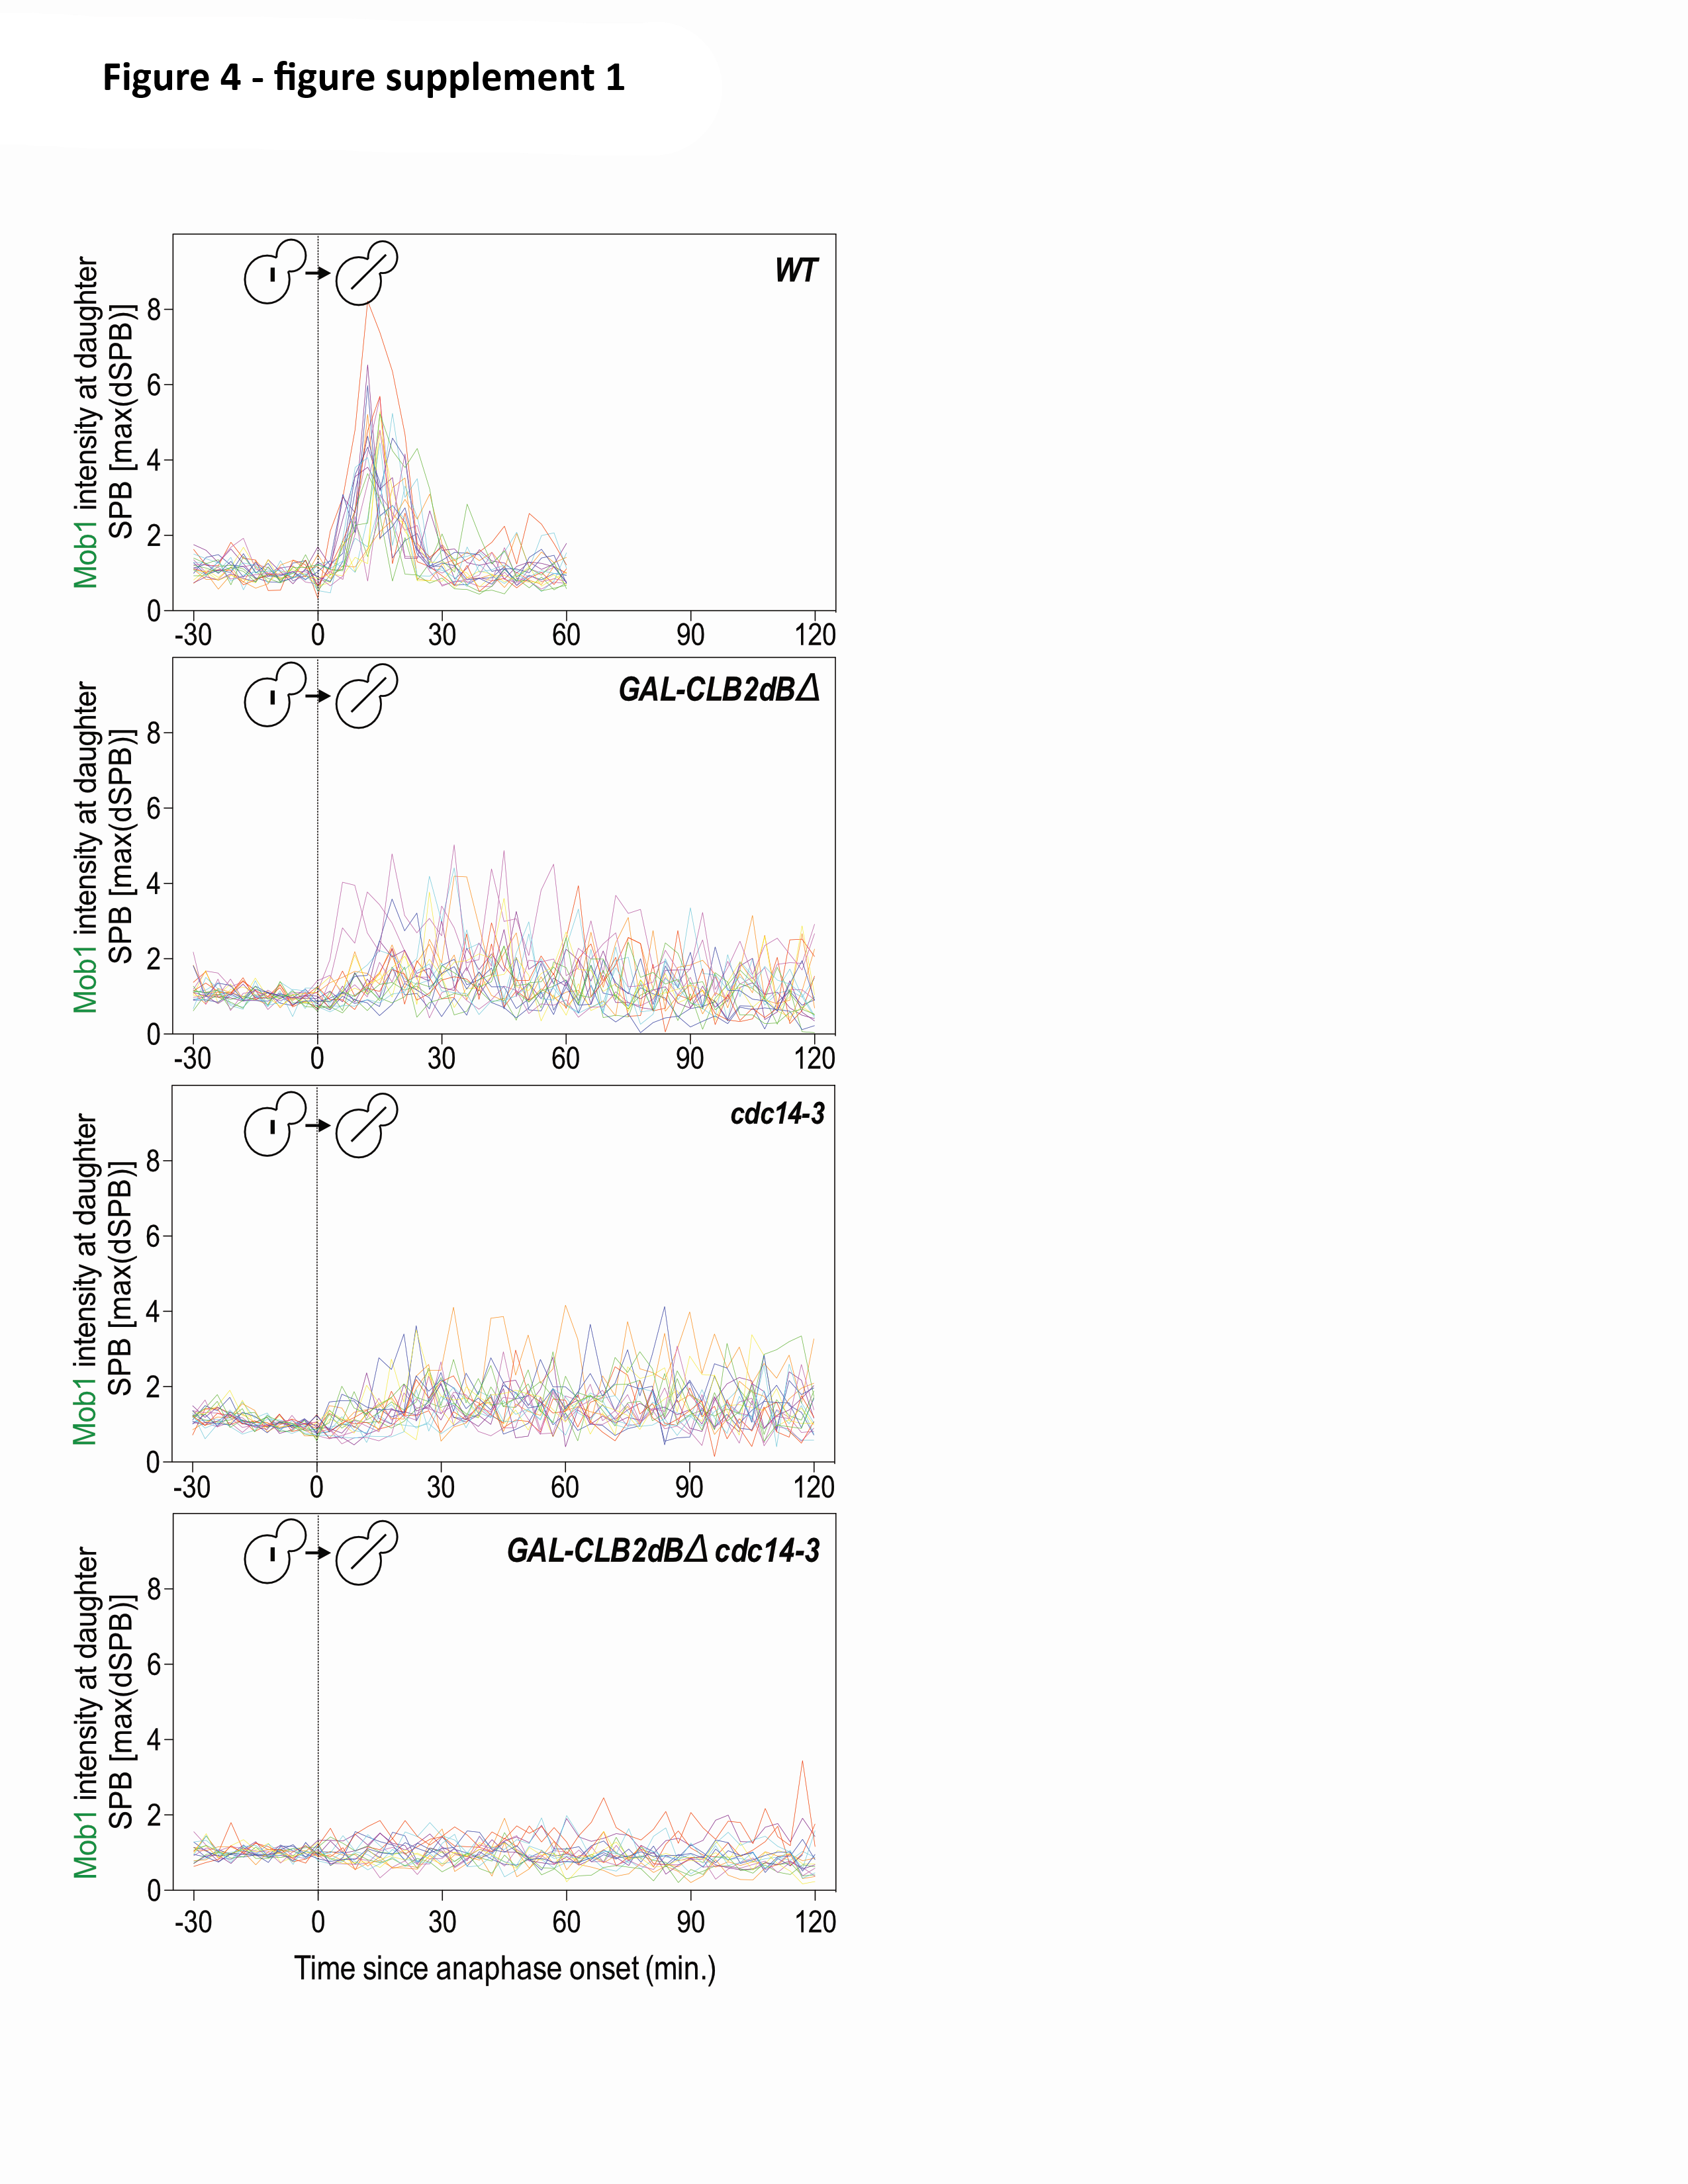

Supplement: supp [file elife-41139-supp-v1.zip › elife_poa_e41139_Figure_4_figure_supplement_1.tif]

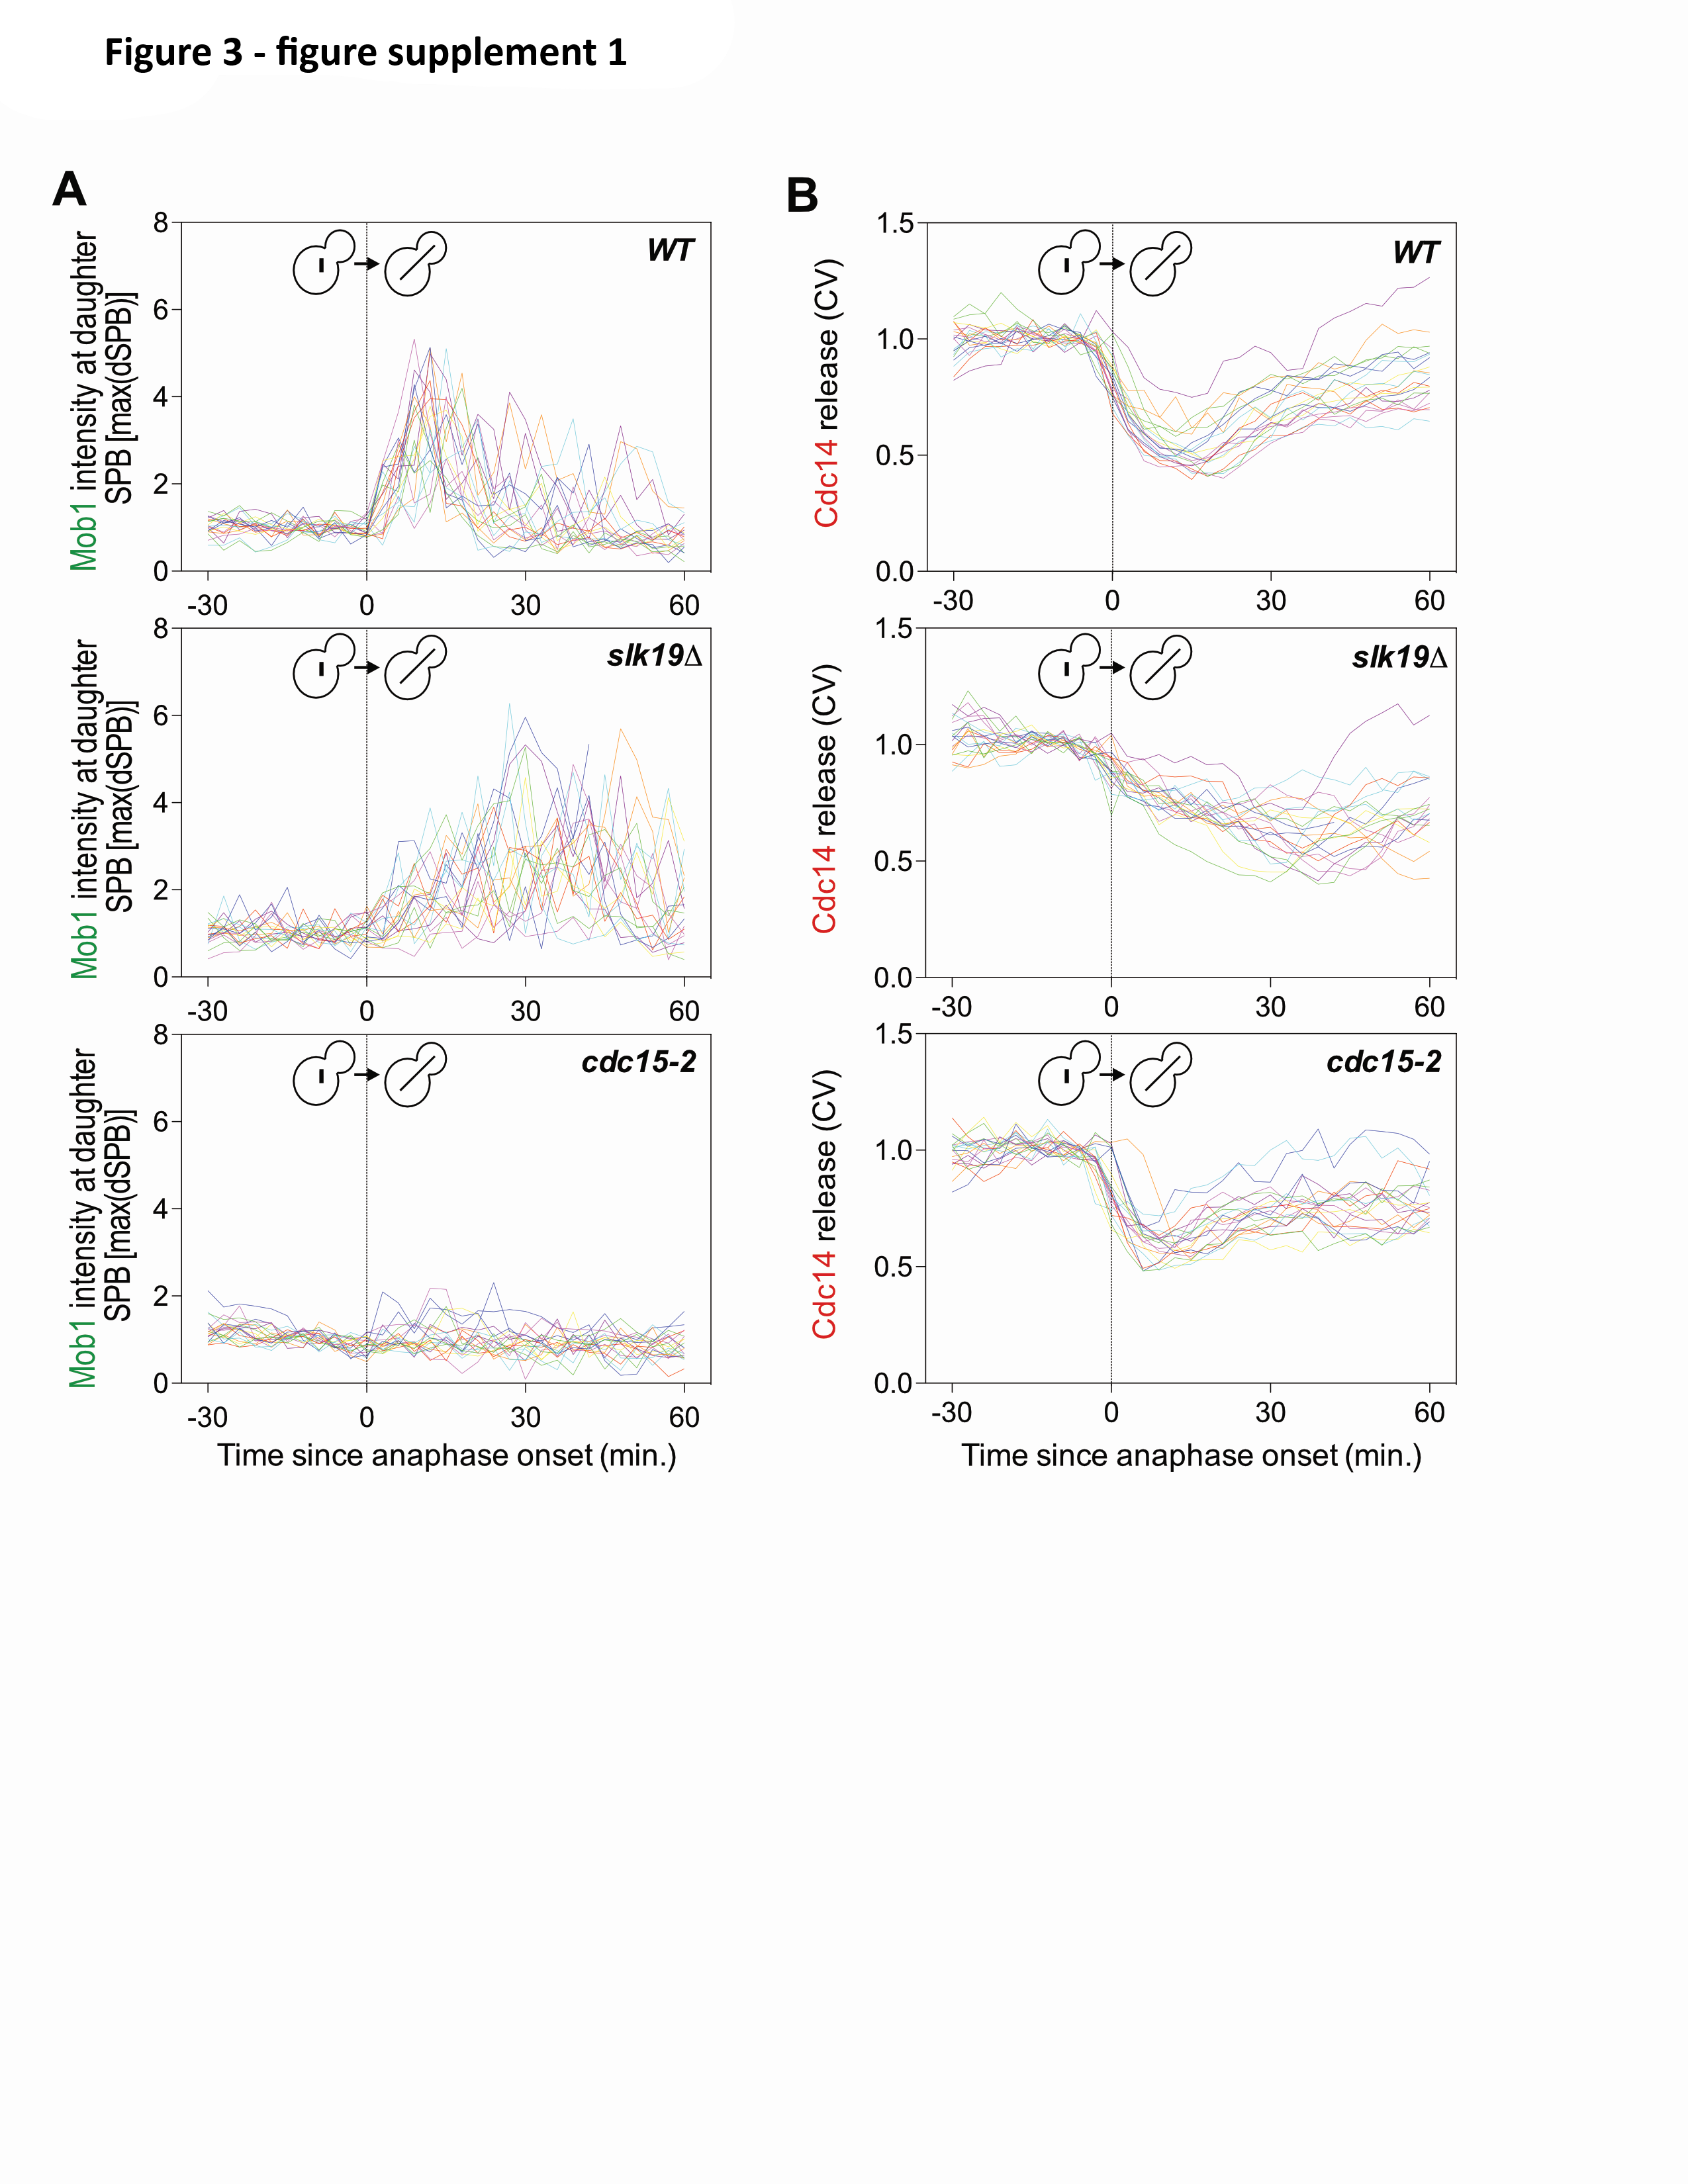

Supplement: supp [file elife-41139-supp-v1.zip › elife_poa_e41139_Figure_3_figure_supplement_1.tif]
